# Supplementary material for: The neuro-glial coagulonome: the thrombin receptor and coagulation pathways as major players in neurological diseases
Source: PubMed Central journal article supplement — Neural Regen Res. 2019 Aug 7;14(12):2043–53. doi: 10.4103/1673-5374.262568 (PMC6788244; doi:10.4103/1673-5374.262568), 2019-08-07
Supplement: NRR-14-2043_Suppl1.pdf [file NRR-14-2043_Suppl1.pdf]

## OPEN PEER REVIEW REPORT 1

**Name of journal:** Neural Regeneration Research

**Manuscript NO:** NRR-D-19-00197

**Title:** The neuro-glial coagulonome: the thrombin receptor and coagulation pathways as major players in neurological diseases

**Reviewer's Name:** Peng Luo

**Reviewer's country:** China

**Date sent for review:** 2019-04-12

**Date reviewed:** 2019-05-02

**Review time:** 20 days

### COMMENTS TO AUTHORS

This review focused on the NG-coagulonome involvement in the pathophysiology of a number of neural diseases in PNS and CNS, modulation of this pathway as a therapeutic target, and potential future research directions. Generally, this manuscript was well written. There were some suggestions for minor revision.

1. The content of abstract should be simplified, and the number of keywords should be reduced.
2. The role of NG-cogulonome in PNS and CNS under physiological condition should be reviewed in an individual section.
